# Supplementary material for: Tungsten carbonyl σ-complexes with C-thioethers based on 9-Me3N-7,8-C2B9H11
Source: Royal Society of Chemistry journal article supplement (doi:10.1039/d0nj03212c), 2020-01-01
Supplement: d0nj03212c1.pdf [file d0nj03212c1.pdf]

# Tungsten Carbonyl $\sigma$ -Complexes with C-thioethers based on 7,8-C<sub>2</sub>B<sub>9</sub>H<sub>11</sub>-9-Me<sub>3</sub>N

Sergey V. Timofeev,<sup>a,\*</sup> Elena A. Prikaznova,<sup>a</sup> Olga B. Zhidkova,<sup>a</sup> Anna A. Druzina,<sup>a</sup> Zoya A. Starikova, Kyrill Yu. Suponitsky,<sup>a,b</sup> Ivan A. Godovikov,<sup>a</sup> Igor B. Sivaev,<sup>a</sup> Vladimir I. Bregadze<sup>a</sup>

<sup>a</sup>*A.N. Nesmeyanov Institute of Organoelement Compounds, Russian Academy of Sciences  
28 Vavilov Str., 119991, Moscow, Russia*

<sup>b</sup>*N.S. Kurnakov Institute of General and Inorganic Chemistry, Russian Academy of Sciences,  
31 Leninskii Prosp., 119991, Moscow, Russia*

E-mail: [timofeev@ineos.ac.ru](mailto:timofeev@ineos.ac.ru)

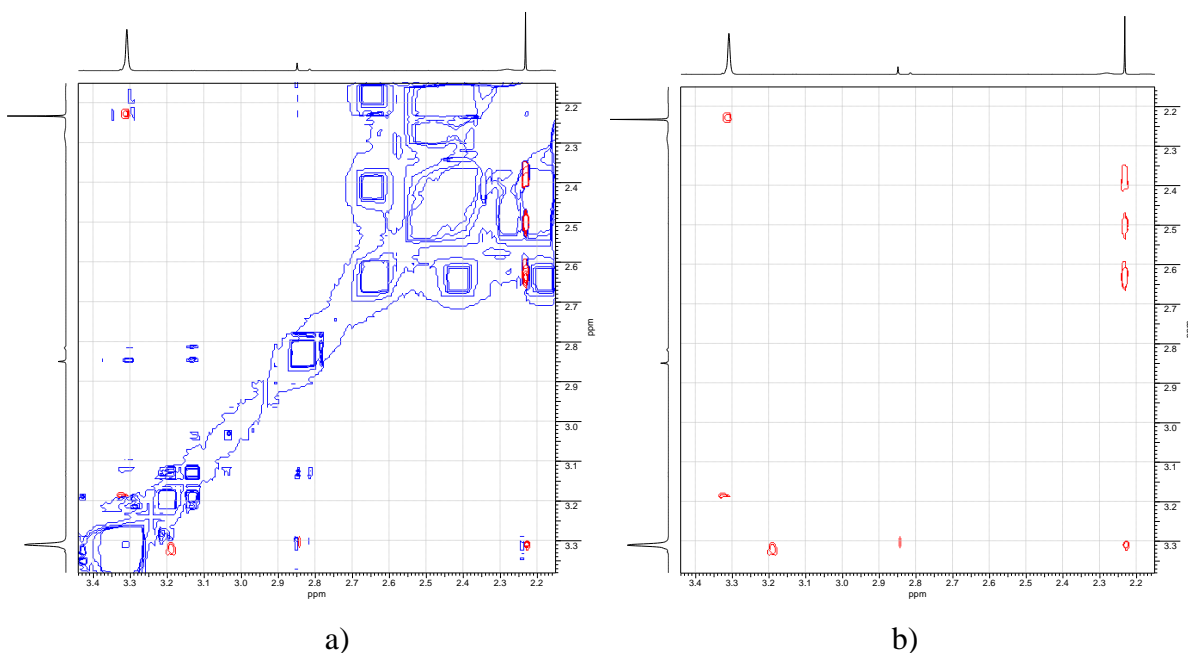

Fig. S1 2D <sup>1</sup>H-<sup>1</sup>H NMR ROESY of **3**. a) common spectrum; b) negative area.

## Experimental

All manipulations with tungsten complexes were performed under an atmosphere of dry argon with the rigid exclusion of air and moisture. Carboranes **1** [1] and **4** [2] were synthesized according to literature. NMR spectra were recorded on a Bruker Avance 400 spectrometer (<sup>1</sup>H-

400.13 MHz,  $^{11}\text{B}$  128.39 MHz,  $^{13}\text{C}$  101.61 MHz). All chemical shifts were reported in  $\delta$  units with reference to the residual protons and carbons of the deuterated solvents for proton and carbon chemical shifts, and to external  $\text{BF}_3\cdot\text{OEt}_2$  (0.00 ppm) for boron chemical shifts. Elemental analyses were carried out at Laboratory of Microanalysis of A.N. Nesmeyanov Institute of Organoelement Compounds of Russian Academy of Sciences.

### Synthesis of [11-Me<sub>3</sub>N-7-MeS-7,8-C<sub>2</sub>B<sub>9</sub>H<sub>10</sub>] (2) and [9-Me<sub>3</sub>N-7-MeS-7,8-C<sub>2</sub>B<sub>9</sub>H<sub>10</sub>] (3)

Solution of trimethylamine hydrochloride (1.53 g, 16.0 mmol) in 3.2 ml of water was added to suspension of **1** (1.00 g, 3.2 mmol) in water (4.5 ml) followed by 16 ml of dichloromethane. Aqueous ammonia (25%, 3.2 ml) was added to vigorously stirred two-layer system and when solution of 6.90 g (27.6 mmol) of  $\text{CuSO}_4\cdot 5\text{H}_2\text{O}$  in 16 ml of water was added dropwise. The reaction mixture was stirred for 7 days at ambient temperature, filtered, organic layer was separated, and aqueous layer was extracted with dichloromethane (2 x 50 ml). Combined organic phases was dried over  $\text{Na}_2\text{SO}_4$ , solvent was removed *in vacuo*. Products were separated by column chromatography on silica using chloroform as eluent. Yield 0.08 g (10%) of **3** (first fraction) and 0.42 g (55%) of **2** (second fraction). **2**:  $^1\text{H}$  NMR (acetone-*d*<sub>6</sub>, ppm,  $\delta$ ): 3.22 (3H, s,  $\text{NMe}_3$ ), 2.99 (1H, s,  $\text{CH}_{\text{carb}}$ ), 2.32 (3H, s,  $\text{SMe}$ ), 2.9  $\div$  0.0 (8H m, ,  $\text{BH}$ ), -2.5  $\div$  -3.3 (1H, br s,  $\text{BHB}$ ).  $^{11}\text{B}$  NMR (acetone-*d*<sub>6</sub>, ppm,  $\delta$ ): 5.9 (1B, s,  $\text{B}^9$ ), -7.0 (1B, d,  $J_{\text{B-H}} = 137$  Hz,  $\text{B}^5$ ), -12.6 (1B, d,  $J_{\text{B-H}} = 154$  Hz,  $\text{B}^2$ ), -15.0 (2B, d,  $J_{\text{B-H}} = 161$  Hz,  $\text{B}^{3,11}$ ), -24.2 (1B, d,  $J_{\text{B-H}} = 142$  Hz,  $\text{B}^4$ ), -27.5 (1B, d,  $J_{\text{B-H}} = 137$  Hz,  $\text{B}^6$ ), -32.6 (1B, d,  $J_{\text{B-H}} = 121$  Hz,  $\text{B}^{10}$ ), -37.9 (1B, d,  $J_{\text{B-H}} = 150$  Hz,  $\text{B}^1$ ).  $^{13}\text{C}$  NMR (acetone-*d*<sub>6</sub>, ppm,  $\delta$ ): 55.1 ( $\text{NMe}_3$ ), 46.3 ( $\text{C}_{\text{carb}}$ ), 17.4 ( $\text{SMe}$ ). **3**:  $^1\text{H}$  NMR (acetone-*d*<sub>6</sub>, ppm,  $\delta$ ): 3.31 (3H, s,  $\text{NMe}_3$ ), 2.28 (1H, s,  $\text{CH}_{\text{carb}}$ ), 2.24 (3H, s,  $\text{SMe}$ ), 3.0  $\div$  0.2 (8H, br m,  $\text{BH}$ ), -2.6  $\div$  -3.3 (1H, br s,  $\text{BHB}$ ).  $^{11}\text{B}$  NMR (acetone-*d*<sub>6</sub>, ppm,  $\delta$ ): 5.6 (1B, s), -7.1 (1B, d,  $J_{\text{B-H}} = 135$  Hz), -15.2 (1B, d,  $J_{\text{B-H}} = 170$  Hz), -17.6 (2B, d,  $J_{\text{B-H}} = 152$  Hz), -23.1 (1B, d,  $J_{\text{B-H}} = 158$  Hz), -26.7 (1B, d,  $J_{\text{B-H}} = 145$  Hz), -32.5 (1B, d,  $J_{\text{B-H}} = 128$  Hz), -37.7 (1B, d,  $J_{\text{B-H}} = 147$  Hz).  $^{13}\text{C}$  NMR (acetone-*d*<sub>6</sub>, ppm,  $\delta$ ): 55.3 ( $\text{NMe}_3$ ), 55.0 ( $\text{C}_{\text{carb}}$ ), 50.1 ( $\text{C}_{\text{carb}}$ ), 18.7 ( $\text{SMe}$ ). Elem. Anal. Found (%): C 30.32; H 9.33; B 40.76. Calc. for  $\text{C}_6\text{H}_{22}\text{B}_9\text{NS}$  (%): C 30.33; H 9.33; B 40.95.

### Synthesis of [9-Me<sub>3</sub>N-7,8-(MeS)<sub>2</sub>-7,8-C<sub>2</sub>B<sub>9</sub>H<sub>9</sub>] (5)

Solution of  $\text{Me}_3\text{N}\cdot\text{HCl}$  (3.92 g, 20.0 mmol) in 10 ml of water was added to the suspension of **4** (3.58 g, 10 mmol) in 15 ml of water then 50 ml of  $\text{CH}_2\text{Cl}_2$  was added.  $\text{CuSO}_4\cdot 5\text{H}_2\text{O}$  (12.00 g, 48.0 mmol) was dissolved in 50 ml of water. Resulting solution was added dropwise to vigorously stirred two-

layer reaction mixture followed by 20 ml of concentrated aqueous ammonia. The color was changed from white to dirty-dark. The reaction mixture was vigorously stirred at room temperature for 170 h and extracted with CH<sub>2</sub>Cl<sub>2</sub> (2 x 50 ml). Organic phases were combined, dried over Na<sub>2</sub>SO<sub>4</sub>. Crude product was purified on silica column using chloroform as eluent. Yield 1.13 g (40%). <sup>1</sup>H NMR (acetone-*d*<sub>6</sub>, ppm, δ): 3.31 (9H, s, NMe<sub>3</sub>), 2.27 (3H, s, SMe), 2.15 (3H, s, SMe), 3.2-0.2 (8H, br. m, BH), -2.3 ÷ -3.3 (1H, br. s, BHB). <sup>11</sup>B NMR (acetone-*d*<sub>6</sub>, ppm, δ): 7.1 (1B, s, B<sup>9</sup>), -7.4 (1B, d, J<sub>B-H</sub> = 136 Hz, B<sup>5</sup>), -13.2 (1B, d, B<sup>11</sup>), -14.8 (2B, d, B<sup>2,3</sup>), -23.1 (1B, d, J<sub>B-H</sub> = 147 Hz, B<sup>4</sup>), -25.9 (1B, d, J<sub>B-H</sub> = 148 Hz, B<sup>6</sup>), -34.0 (1B, d, J<sub>B-H</sub> = 140 Hz, B<sup>10</sup>), -37.3 (1B, d, J<sub>B-H</sub> = 146 Hz, B<sup>1</sup>). <sup>13</sup>C NMR (acetone-*d*<sub>6</sub>, ppm, δ): 65.8 (C<sub>carb</sub>), 61.7 (C<sub>carb</sub>), 55.1 (NMe), 19.7 (SMe), 19.4 (SMe). Elem. Anal: Found (%): C 29.74; H 8.68; B 34.19. Calc. for C<sub>7</sub>H<sub>24</sub>B<sub>9</sub>NS<sub>2</sub>: C 29.64; H 8.53; B 34.30.

#### Synthesis of (CO)<sub>5</sub>W[11-Me<sub>3</sub>N-7-MeS-7,8-C<sub>2</sub>B<sub>9</sub>H<sub>10</sub>-κ<sup>1</sup>-S(1)] (6)

Tungsten hexacarbonyl (0.11 g, 0.3 mmol) in 5 ml of THF in quartz reactor cooled by water was irradiated with UV-lamp for 2 h. Reaction mixture was turned yellow and 0.07 g (0.3 mmol) of **2** was added. After stirring overnight, solvent was evaporated. Product was purified by column chromatography on silica using chloroform as eluent. Yield 0.14 g (87%). <sup>1</sup>H NMR (CDCl<sub>3</sub>, ppm, δ): 3.23 (9H, s, NMe<sub>3</sub>), 2.71 (3H, s, SMe), 2.41 (1H, s, CH<sub>carb</sub>), 3.0 ÷ 0.0 (8H, m, BH), -2.5 ÷ -3.5 (1H, br.s., BHB). <sup>11</sup>B NMR (CDCl<sub>3</sub>, ppm, δ): 5.8 (1B, s), -5.9 (1B, d, J<sub>B-H</sub> = 119 Hz), -16.0 (1B, d, J<sub>B-H</sub> = 105 Hz), -16.6 (2B, d), -23.0 (1B, d, J<sub>B-H</sub> = 146 Hz), -26.0 (1B, d, J<sub>B-H</sub> = 145 Hz), -32.2 (1B, d, J<sub>B-H</sub> = 116 Hz), -36.3 (1B, d, J<sub>B-H</sub> = 158 Hz). <sup>13</sup>C NMR (CDCl<sub>3</sub>, ppm, δ): 199.0 (t, J<sub>C-W</sub> = 79 Hz, *cis*-CO), 196.6 (t, J<sub>C-W</sub> = 65 Hz, *trans*-CO), 56.8 (NMe<sub>3</sub>), 47.6 (C<sub>carb</sub>), 30.1 (SMe).

#### Synthesis of (CO)<sub>5</sub>W[9-Me<sub>3</sub>N-7-MeS-7,8-C<sub>2</sub>B<sub>9</sub>H<sub>10</sub>-κ<sup>1</sup>-S(1)] (7)

Tungsten hexacarbonyl (0.32 g, 0.9 mmol) in 5 ml of THF in quartz reactor cooled by water was irradiated with UV-lamp for 2 h. Reaction mixture was turned yellow and 0.20 g (0.9 mmol) of **3** was added. After stirring overnight, solvent was removed *in vacuo*. Product was purified by column chromatography on silica using chloroform as eluent. Yield 0.40 g (86%). <sup>1</sup>H NMR (acetone-*d*<sub>6</sub>, ppm, δ): 3.26 (9H, s, NMe<sub>3</sub>), 3.01 (3H, s, SMe), 3.0 ÷ 0.0 (8H, m, BH), -2.5 ÷ -3.3 (1H, br. s, BHB). <sup>11</sup>B NMR (acetone-*d*<sub>6</sub>, ppm, δ): 6.2 (1B, s), -5.8 (1B, d, J<sub>B-H</sub> = 131 Hz), -12.6 (1B, d, J<sub>B-H</sub> = 158 Hz), -15.6 (2B, d, J<sub>B-H</sub> = 158 Hz), -24.1 (1B, d, J<sub>B-H</sub> = 148 Hz), -27.5 (1B, d, J<sub>B-H</sub> = 148 Hz), -32.1 (1B, d), -37.4 (1B, d, J<sub>B-H</sub> = 150 Hz). <sup>13</sup>C NMR (acetone-*d*<sub>6</sub>, ppm, δ): 201.3 (t, J<sub>C-W</sub> = 78 Hz, *cis*-CO), 197.2 (t, J<sub>C-W</sub> = 65 Hz, *trans*-CO), 54.4 (NMe<sub>3</sub>), 51.8 (C<sub>carb</sub>), 31.1 (SMe).

### Synthesis of $(\text{CO})_5\text{W}[\text{nido-7,8-(MeS)}_2\text{-9-Me}_3\text{N-7,8-C}_2\text{B}_9\text{H}_9\text{-}\kappa^1\text{-S(1)}]$ (**8**)

Tungsten hexacarbonyl (0.35 g, 1.0 mmol) in 5 ml of THF in quartz reactor cooled by water was irradiated with UV-lamp for 3 h. Reaction mixture was turned yellow and solid **5** (0.25 g, 0.9 mmol) was added. After stirring overnight, solvent was evaporated. Product was purified by column chromatography on silica using hexane/toluene (1:3, v/v) as eluent. Yield 0.37 g (60%).  $^1\text{H}$  NMR (acetone- $d_6$ , ppm,  $\delta$ ): 3.39 (9H, s,  $\text{NMe}_3$ ), 3.35 (3H, s,  $\text{SMe}$ ), 2.25 (3H, s,  $\text{SMe}$ ), 3.3-0.3 (8H, br. m,  $\text{BH}$ ), -2.4  $\div$  -3.2 (1H, br. s,  $\text{BHB}$ ).  $^{11}\text{B}$  NMR (acetone- $d_6$ , ppm,  $\delta$ )  $\delta$  7.1 (1B, s), -6.4 (1B, d), -13.4 (1B, d), -14.9 (2B, d), -23.0 (1B, d,  $J = 157$  Hz), -25.9 (1B, d,  $J = 146$  Hz), -33.1 (1B, d), -36.5 (1B, d).  $^{11}\text{B}$  NMR ( $\text{CDCl}_3$ , ppm,  $\delta$ ): 6.3 (1B, s,  $\text{B}^9$ ), -6.2 (1B, d,  $J_{\text{B-H}} = 116$  Hz,  $\text{B}^5$ ), -14.5 (3B,  $\text{B}^{11,2,3}$ ), -22.3 (1B, d,  $J_{\text{B-H}} = 139$  Hz,  $\text{B}^4$ ), -25.8 (1B, d,  $J_{\text{B-H}} = 148$  Hz,  $\text{B}^6$ ), -32.0 (1B, d,  $\text{B}^{10}$ ), -35.9 (1B, d,  $J_{\text{B-H}} = 139$  Hz,  $\text{B}^1$ ).  $^{13}\text{C}$  NMR (acetone- $d_6$ , ppm,  $\delta$ ): 198.6 (*cis*-CO), 191.5 (*trans*-CO), 55.5 ( $\text{NMe}_3$ ), 19.9 ( $\text{SMe}$ ). IR (MeOH,  $\text{cm}^{-1}$ ): 2075 (CO), 1993 (CO), 1889 (CO). Elem. Anal.: Found (%): C 23.93; H 3.77; N 2.25; B 16.11. Calc. for  $\text{C}_{12}\text{H}_{25}\text{B}_9\text{NO}_5\text{S}_2\text{W}$ : C 23.68; H 4.14; N 2.30; B 15.99.

### Synthesis of $(\text{CO})_4\text{W}[\text{nido-7,8-(MeS)}_2\text{-9-Me}_3\text{N-7,8-C}_2\text{B}_9\text{H}_9\text{-}\kappa^2\text{-S(1), S(2)}]$ (**9**)

Carborane **5** (0.25 g, 0.9 mmol) was added at room temperature to solution of  $\text{W}(\text{CO})_3(\text{MeCN})_3$  (0.50 g, 1.3 mmol) in 10 ml of  $\text{CH}_2\text{Cl}_2$ . Reaction mixture was stirred at room temperature overnight. Solvent was removed *in vacuo*. Crude product was purified on silica column using toluene as eluent. Complex **9** was isolated as yellow powder. Yield 0.36 g (71%).  $^1\text{H}$  NMR ( $\text{CDCl}_3$ , ppm,  $\delta$ )  $\delta$  3.27 (9H, s,  $\text{NMe}_3$ ), 2.33 (3H, s,  $\text{SMe}$ ), 2.20 (3H, s,  $\text{SMe}$ ), 3.0-0.0 (8H, br. m,  $\text{BH}$ ) -2.6  $\div$  -3.4 (1H, br. s,  $\text{BHB}$ ).  $^1\text{H}$  NMR (acetone- $d_6$ , ppm,  $\delta$ )  $\delta$  3.34 (9H, s,  $\text{NMe}_3$ ), 2.30 (3H, s,  $\text{SMe}$ ), 2.18 (3H, s,  $\text{SMe}$ ), -3.0  $\div$  -0.1 (8H, br. m,  $\text{BH}$ ), -2.4  $\div$  -3.3 (1H, br. s,  $\text{BHB}$ ).  $^{11}\text{B}$  NMR ( $\text{CDCl}_3$ , ppm,  $\delta$ )  $\delta$  6.7 (1B, s), -7.1 (1B, d,  $J = 142$  Hz), -12.8 (1B, d), -15.1 (2B, d), -22.9 (1B, d,  $J = 156$  Hz), -25.9 (1B, d,  $J = 144$  Hz), -33.8 (1B, d), -37.2 (1B, d,  $J = 148$  Hz).  $^{11}\text{B}$  NMR (acetone- $d_6$ , ppm,  $\delta$ ) 7.1 (1B, s), -7.5 (1B, d,  $J = 142$  Hz), -13.3 (1B, d,  $J = 178$  Hz), -14.9 (2B, d,  $J = 178$  Hz), -23.1 (1B, d,  $J = 156$  Hz), -25.9 (1B, d,  $J = 147$  Hz), -34.0 (1B, d,  $J = 136$  Hz), -37.3 (1B, d,  $J = 147$  Hz).  $^{13}\text{C}$  NMR ( $\text{CDCl}_3$ , ppm,  $\delta$ ) 207.8 (CO), 201.8 (CO), 55.9 ( $\text{NMe}_3$ ), 20.5 ( $\text{SMe}$ ), 20.3 ( $\text{SMe}$ ).  $^{13}\text{C}$  NMR (acetone- $d_6$ , ppm,  $\delta$ ) 207.6 (CO), 201.1 (CO), 66.0 ( $\text{C}_{\text{carb}}$ ), 61.7 ( $\text{C}_{\text{carb}}$ ) 55.2 ( $\text{NMe}_3$ ), 30.8 ( $\text{SMe}$ ), 30.5 ( $\text{SMe}$ ).

### X-ray diffraction study

Suitable for X-ray diffraction crystals of **3** and **9** were grown from chloroform solution. Crystals of **8** was grown by crystallization from chloroform solution layered with carbon tetrachloride. Single crystal X-ray study of compounds **3**, **8** and **9** were carried out with SMART APEX II CCD diffractometer ( $\lambda(\text{Mo-K}\alpha) = 0.71073 \text{ \AA}$ , graphite monochromator,  $\omega$ -scans) at 100 K. Crystallographic data (excluding structure factors) for the structure have been deposited at the Cambridge Crystallographic Data Centre (CCDC) as supplementary publication No. CCDC 1988624 for **3**, 1988625 for **8** and 1988626 for **9**.

Compound **3**: crystals  $\text{C}_6\text{H}_{22}\text{B}_9\text{NS}$  are orthorhombic, space group  $P2_12_12_1$ :  $a = 8.9801(11) \text{ \AA}$ ,  $b = 10.0922(12) \text{ \AA}$ ,  $c = 14.8274(19) \text{ \AA}$ ,  $V = 1343.8(3) \text{ \AA}^3$ ,  $Z = 4$ ,  $d_{\text{calc}} = 1.174 \text{ g}\cdot\text{cm}^{-3}$ ,  $\mu = 0.207 \text{ mm}^{-1}$ ,  $wR2 = 0.1321$  calculated on  $F^2_{hkl}$  for all 3918 independent reflections with  $2\theta < 30.0^\circ$ , ( $GOF = 0.991$ ,  $R = 0.0547$  calculated on  $F_{hkl}$  for 2829 reflections with  $I > 2\sigma(I)$ ).

Compound **8**: crystals ( $\text{C}_{12}\text{H}_{24}\text{B}_9\text{NO}_5\text{S}_2\text{W}\cdot\text{CHCl}_3$ ) are monoclinic, space group  $P2_1/c$ :  $a = 8.7839(6) \text{ \AA}$ ,  $b = 24.7066(16) \text{ \AA}$ ,  $c = 12.4515(8) \text{ \AA}$ ,  $\beta = 98.5310(10)$ ,  $V = 2672.3(3) \text{ \AA}^3$ ,  $Z = 4$ ,  $d_{\text{calc}} = 1.807 \text{ g}\cdot\text{cm}^{-3}$ ,  $\mu = 4.805 \text{ mm}^{-1}$ ,  $wR2 = 0.1021$  calculated on  $F^2_{hkl}$  for all 5223 independent reflections with  $2\theta < 52.0^\circ$ , ( $GOF = 1.178$ ,  $R = 0.0420$  calculated on  $F_{hkl}$  for 4371 reflections with  $I > 2\sigma(I)$ ).

Compound **9**: crystals ( $\text{C}_{11}\text{H}_{24}\text{B}_9\text{NO}_4\text{S}_2\text{W}$ ) are monoclinic, space group  $P2_1/c$ :  $a = 9.2287(9) \text{ \AA}$ ,  $b = 12.8890(12) \text{ \AA}$ ,  $c = 17.9254(17) \text{ \AA}$ ,  $\beta = 99.325(2)$ ,  $V = 2104.0(3) \text{ \AA}^3$ ,  $Z = 4$ ,  $d_{\text{calc}} = 1.830 \text{ g}\cdot\text{cm}^{-3}$ ,  $\mu = 5.706 \text{ mm}^{-1}$ ,  $wR2 = 0.0496$  calculated on  $F^2_{hkl}$  for all 5718 independent reflections with  $2\theta < 58.5^\circ$ , ( $GOF = 1.073$ ,  $R = 0.0191$  calculated on  $F_{hkl}$  for 5411 reflections with  $I > 2\sigma(I)$ ).

## References

1. S.V. Timofeev, M.V. Zakharova, E.M. Mosolova, I.A. Godovikov, I.V. Ananyev, I.B. Sivaev, V.I. Bregadze, J. Organomet. Chem. 721-722 (2012) 92-96.
2. S.V. Timofeev, O.B. Zhidkova, E.M. Mosolova, I.B. Sivaev, I.A. Godovikov, K.Yu. Suponitsky, Z.A. Starikova, V.I. Bregadze, Dalton Trans. 44 (2015) 6449–6456.
